# Supplementary material
Source: PubMed Central journal article supplement (PMC7573977)
Supplement: NIHMS1549736-supplement-1.pdf [file NIHMS1549736-supplement-1.pdf]

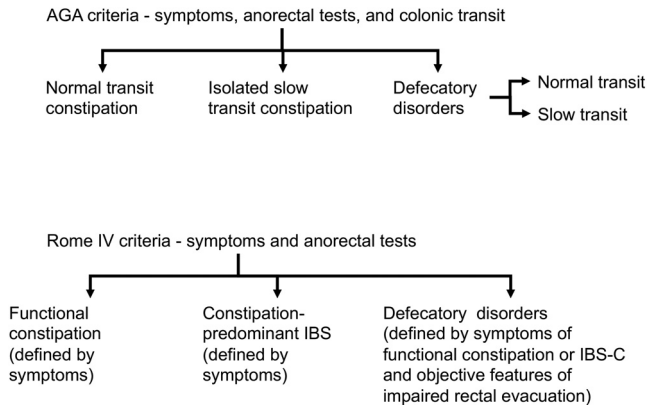

**Supplementary Figure 1.** American Gastroenterological Association (AGA) (*upper panel*) and Rome IV classifications (*lower panel*) of chronic constipation.

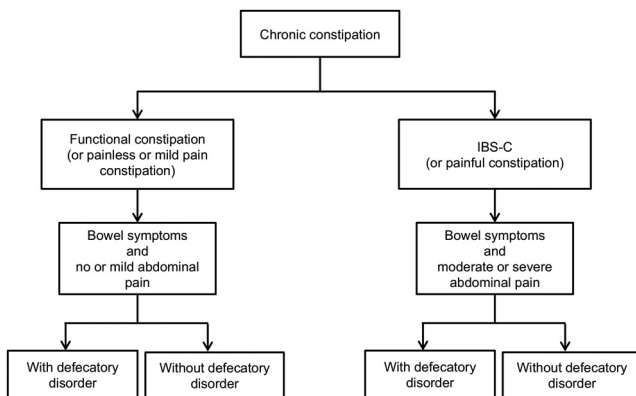

**Supplementary Figure 2.** Revised classification of chronic constipation into painless and painful constipation.

A. Health Adult

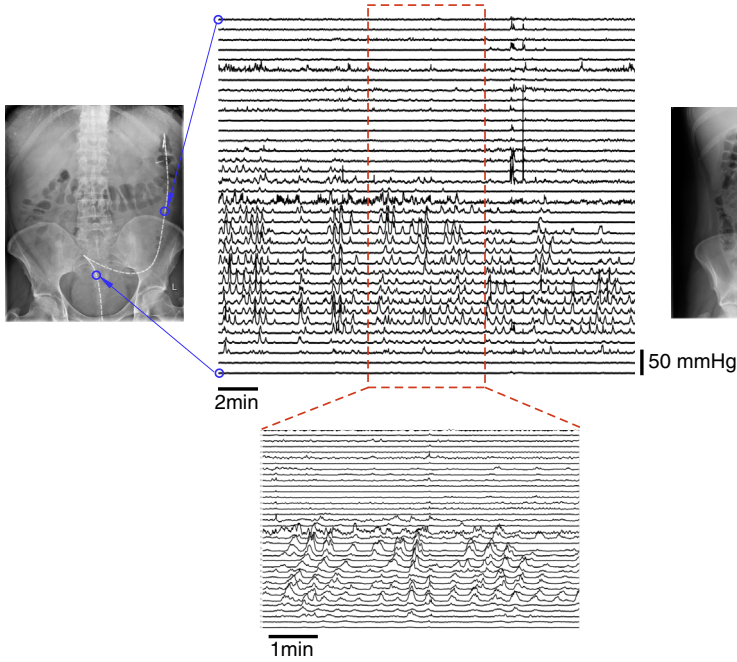

B. Adult patient with Slow Transit Constipation

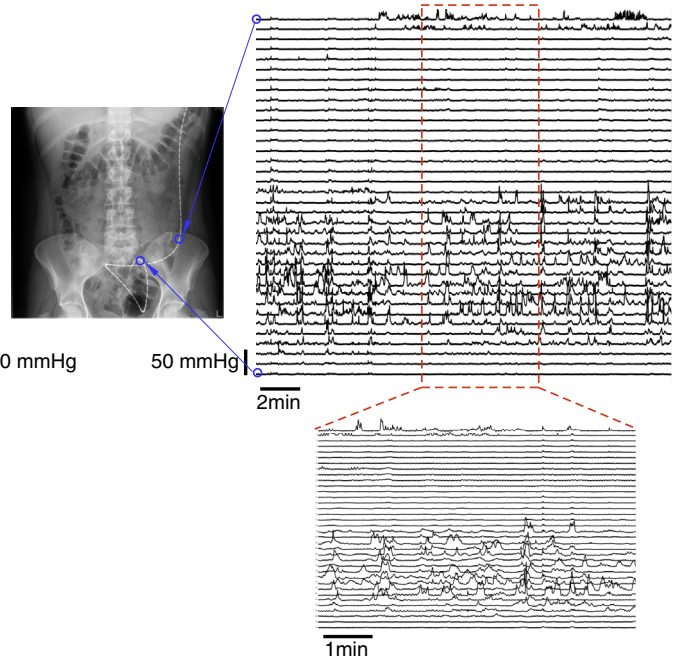

**Supplementary Figure 3.** Comparison of colonic high-resolution manometry tracings in a healthy person (*left panel*) and a constipated patient (*right panel*). Both tracings were recorded approximately 40 minutes after the meal. Observe nicely coordinated, propagating events occurring at approximately 2–3 cpm in the healthy person. In the patient, there is more chaotic activity at 2–3 cpm activity. Courtesy of Dr Phil Dinning.

**Supplementary Table 1.** Medications Associated With Constipation

| Class                                              | Examples                                                |
|----------------------------------------------------|---------------------------------------------------------|
| 5-HT <sub>3</sub> -receptor antagonists            | Ondansetron                                             |
| Analgesics                                         |                                                         |
| Opiates <sup>a</sup>                               | Morphine                                                |
| Nonsteroidal anti-inflammatory agents <sup>a</sup> | Ibuprofen                                               |
| Anticholinergic agents                             | Librax, belladonna                                      |
| Tricyclic antidepressants <sup>a</sup>             | Amitriptyline > nortriptyline                           |
| Antiparkinsonian drugs                             | Benzatropine                                            |
| Antipsychotics                                     | Chlorpromazine                                          |
| Antispasmodics <sup>a</sup>                        | Dicyclomine                                             |
| Antihistamine <sup>a</sup>                         | Diphenhydramine                                         |
| Anticonvulsants <sup>a</sup>                       | Carbamazepine                                           |
| Antihypertensives                                  |                                                         |
| Calcium channel blockers                           | Verapamil, nifedipine                                   |
| Diuretics <sup>a,b</sup>                           | Furosemide                                              |
| Centrally acting                                   | Clonidine                                               |
| Antiarrhythmics                                    | Amiodarone                                              |
| β-adrenoceptor antagonist                          | Atenolol                                                |
| Bile acid sequestrants                             | Cholestyramine, colestipol                              |
| Cation-containing agents                           |                                                         |
| Aluminum <sup>a</sup>                              | Antacids, sucralfate                                    |
| Calcium                                            | Antacids, supplements                                   |
| Bismuth                                            |                                                         |
| Iron supplements                                   | Ferrous sulfate                                         |
| Lithium                                            |                                                         |
| Chemotherapy agents                                |                                                         |
| Vinca alkaloids                                    | Vincristine                                             |
| Alkylating agents                                  | Cyclophosphamide                                        |
| Miscellaneous compounds                            | Barium sulfate, oral contraceptives, polystyrene resins |
| Endocrine medications                              | Pamidronate and alendronic acid                         |
| Other antidepressants                              | Monoamine oxidase inhibitors                            |
| Other antipsychotics                               | Clozapine, haloperidol, risperidone                     |
| Other antiparkinsonian drugs                       | Dopamine agonists                                       |
| Other antispasmodics                               | Mebeverine, peppermint oil                              |
| Sympathomimetics                                   | Ephedrine, terbutaline                                  |

NOTE. From Bharucha et al.,<sup>4</sup> adapted with permission.

5-HT, 5-hydroxytryptamine.

<sup>a</sup>Drugs associated with constipation in community-based studies.<sup>157,158</sup>

<sup>b</sup>Perhaps related to electrolyte disturbances.
